# Supplementary material
Source: publisher site journal article supplement (https://www.dovepress.com/article/504485)
Supplement: Supplementary file 1 [file get_supplementary_file.php]

**Supplemental Table 1** Primer sequences.

| Primer | Forward ( 3’− 5’) | Reverse ( 3’− 5’) |
| --- | --- | --- |
| H-IL-1β | AGCTACGAATCTCCGACCAC | CGTTATCCCATGTGTCGAAGAA |
| H-S100A7 | ACGTGATGACAAGATTGACAAGC | GCGAGGTAATTTGTGCCCTTT |
| H-CXCL2 | CCCATGGTTAAGAAAATCATCG | CTTCAGGAACAGCCACCAAT |
| H-CXCL5 | AGCTGCGTTGCGTTTGTTTAC | TGGCGAACACTTGCAGATTAC |
| H-CXCL8 | TTTTGCCAAGGAGTGCTAAAGA | AACCCTCTGCACCCAGTTTTC |
| H-CCL3 | AGTTCTCTGCATCACTTGCTG | CGGCTTCGCTTGGTTAGGAA |
| H-RPLP0 | TGGTCATCCAGCAGGTGTTCGA | CAGACACTGGCAACATTGCGG |


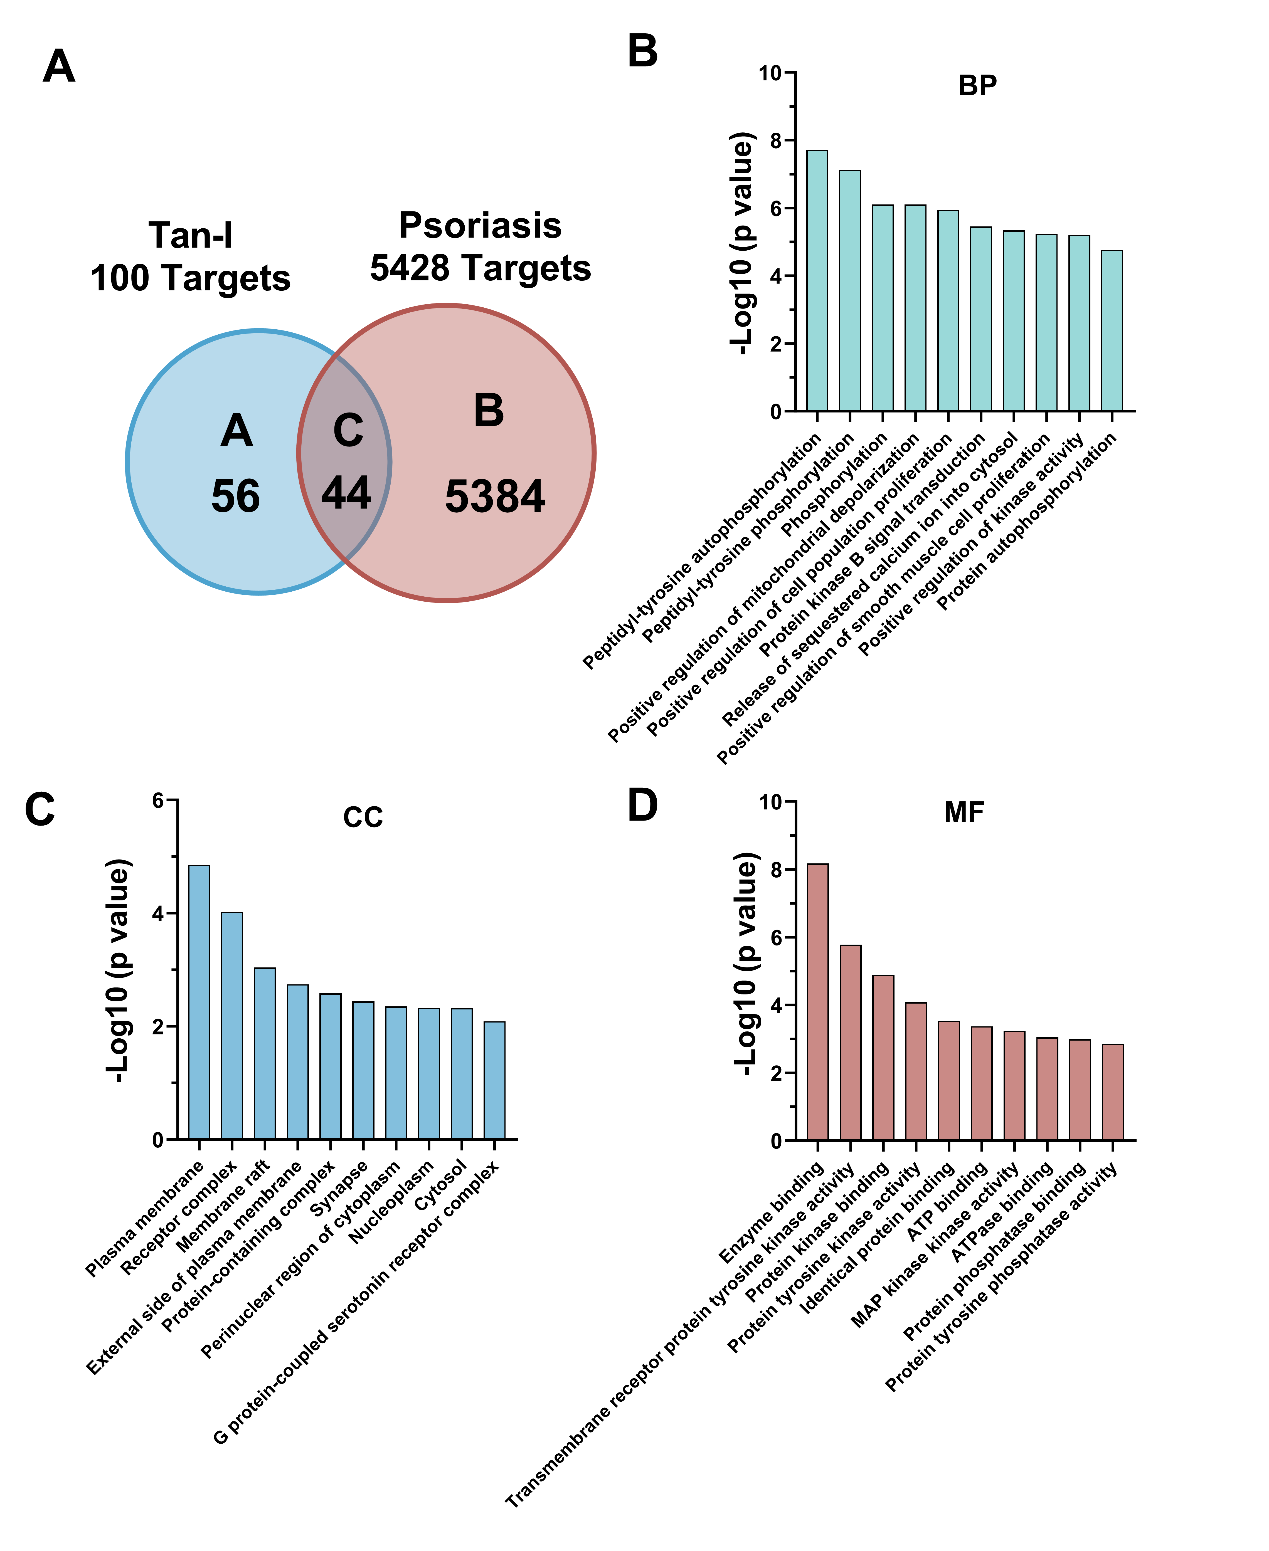


**Supplemental Figure 1** Network Pharmacology Analysis.

(A)The overlap between Tan-I targets and psoriasis pathogenic genes was analyzed by Venn diagram. (B-D)The DAVID database was utilized to conduct GO enrichment analysis to initially reveal the mechanism of Tan-I by the analysis of network pharmacology.


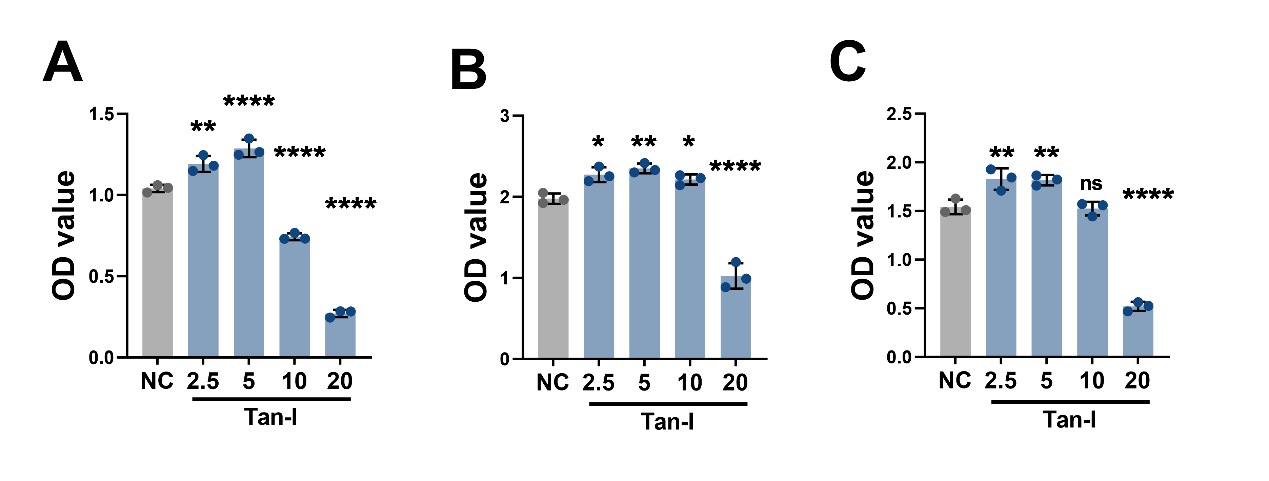


**Supplemental Figure 2** Effect of Tan-I on HaCaT cell viability at different time points.

Cell viability of HaCaT cells treated with various concentrations of Tan-I for (A) 24 h, (B) 48, and (C) 72 h, as measured by CCK-8 assay (The gray bars represent the negative control group, the blue bars represent the Tan-I treatment group, and each point in the graph represents a biological sample). Data are presented as mean ± SD. Statistical significance is indicated as **P* <0.05, ***P* <0.01, **** *P* <0.0001, ns = not significant.
